# Supplementary material
Source: PubMed Central journal article supplement (PMC3296059)

# **Chemical and Mechanical Impact of Silica Nanoparticles on the Phase Transition Behavior of Phospholipid Membranes in Theory and Experiment**

C. Westerhausen,<sup>†</sup> F. Strobl,<sup>†</sup> R. Herrmann,<sup>‡</sup> A. T. Bauer,<sup>§</sup> S. W. Schneider,<sup>§</sup> A. Reller,<sup>‡</sup> A. Wixforth,<sup>†</sup> and M. F. Schneider<sup>¶</sup>

## Supplementary Material

**Figure 1 – DLS and TEM Measurements concerning agglomeration of coated NP**

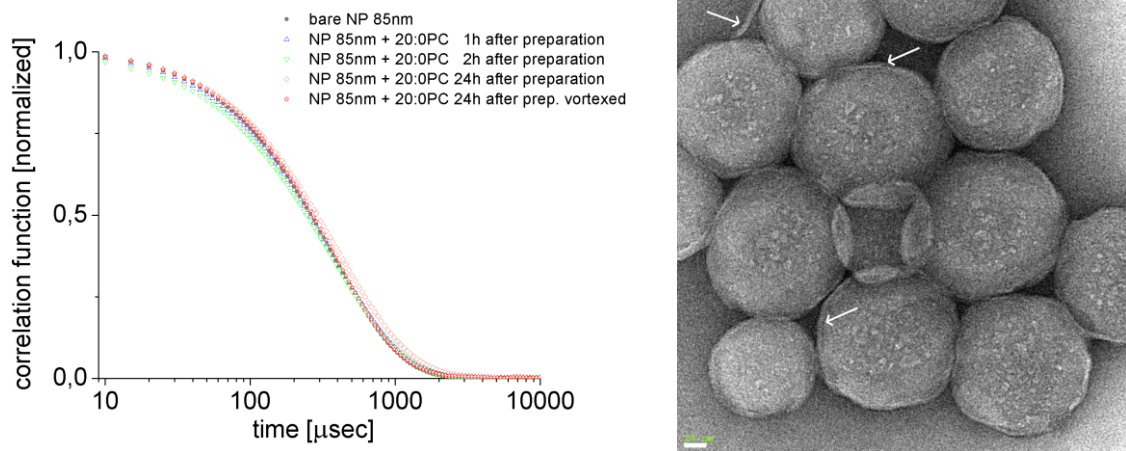

**Figure 2 - Free parameter of the fit in figure 7:  $z := \kappa_G/\kappa$  in dependence on the lipid chain length.**

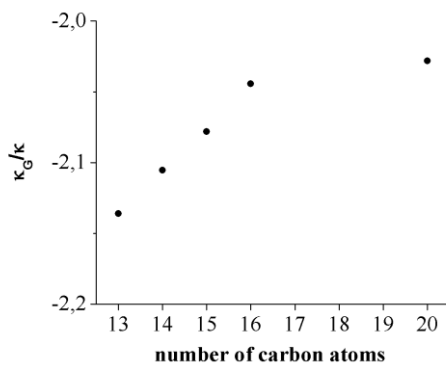

**Figure 3 – Fit comparable to figure 7 with  $\Delta G_S$  and  $c_0$  as additional free parameters: a) Fit with  $\Delta G_S$  and  $c_0$  as additional free parameters b) Fit with  $\Delta G_S$  fixed and  $c_0$  as free parameters c) overview of fitting parameters  $\Delta G_S$  and  $c_0$  as function of chain length  $h$  (open symbols for free  $\Delta G_S$  (see inset)/ closed symbols for  $\Delta G_S = 150\text{J/mol}$ ).**

a)

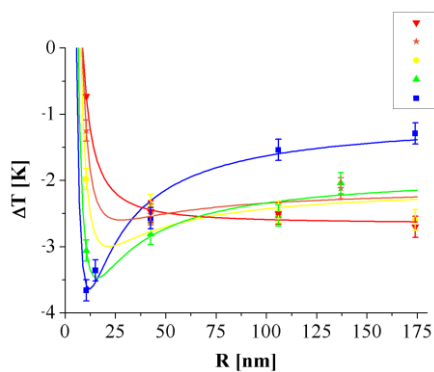

b)

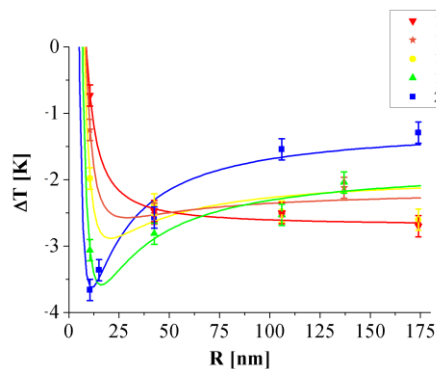

c)

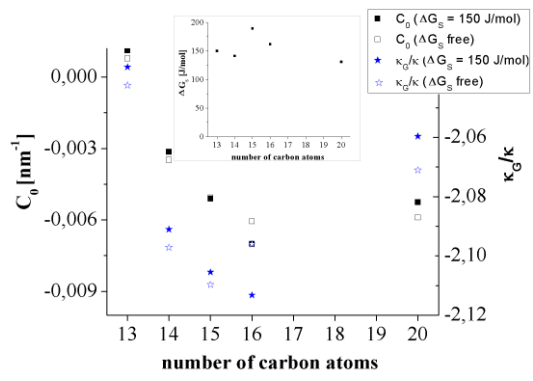

Supplement: mmc1.pdf [file mmc1.pdf]
